# **Title Page**

Genetic structure of Photosystem II functionality in rice unraveled by GWAS analysis

running title: GWAS of PSII functionality in rice

Authors:

<sup>1</sup>Juan Manuel Vilas                      juanmvilas@gmail.com

<sup>2</sup>Estanislao Burgos                      burgosestanislao@gmail.com

<sup>1</sup>Maria Lucrecia Puig                      lucreciapuig@gmail.com

<sup>3</sup>Jose Colazo                      colazo.jose@inta.gob.ar

<sup>3</sup>Alberto Livore                      alivore@yahoo.com.ar

<sup>1</sup>Oscar Adolfo Ruiz                      ruiz@intech.gov.ar

<sup>2</sup>Fernando Carrari                      carrarifernando@gmail.com

<sup>1</sup>Andrés Alberto Rodriguez                      andres.a.rodriguez@gmail.com

<sup>1</sup>Santiago Javier Maiale                      santiagomaiale@hotmail.com

<sup>1</sup> UBI, INTECH, CONICET-UNSAM, Int. Marino Km 8, Chascomús, Pcia. Bs As., Argentina

<sup>2</sup> IFIBYNE, FCEyN, CONICET-UBA, Ciudad Universitaria, CABA, Argentina

<sup>3</sup> EEA INTA Concepción del Uruguay, Ruta 39 Km 143, Concepción del Uruguay, Pcia. ER, Argentina

date of submission:

five figures; four tables; three supplemental figures; three supplemental tables.

Total words: 4983

# **Highlight:**

The genetic structure of the Photosystem II functionality in rice was studied by using genome-wide association through chlorophyll fluorescence.

# **Abstract:**

Rice production is a particularly important crop for the half-world population. Therefore, knowledge about which genes are implicated in the functionality of the Photosystem II, that are still poorly explored could collaborate in the assisted selection of rice improving. In the present study, we applied Genome wide Association Studies of PSII chlorophyll fluorescence under two contrasting environmental conditions in 283 rice accessions highly diverse. A total of 110 significant association SNP-phenotype were observed, and 69 quantitative trait loci identified with a total of 157 genes, of which 38 were highly significant, mapped spread out through rice genome. These underlying regions are enriched in genes related to biotic and abiotic stresses, transcription factors, Calvin cycle, senescence, and grain characters. The correlations analyses PSII chlorophyll fluorescence parameters and some panicle characteristics found here suggest the possibility of developing molecular markers to assist the breeding programs that improve photosynthesis and yield in rice.

**Keywords:** Chlorophyll Fluorescence, Gene, Genome-wide association, Panicle, Rice, Single nucleotide polymorphisms

**Abbreviations:** %In, calculated infertility percentage; %F, fertility percentage; GO, gene ontology; GWAS, genome-wide association; NSP, number of spikelet per panicle; PN, panicle number; PSII, photosystem II; PW, panicle weight; SNP, single nucleotide polymorphisms; WTG thousand grain weight.

## 1. Introduction:

Asian rice (*Oryza sativa* L.) is one of the most important crops in the world and constitutes, approximately, the main food of the three billion humans in countries of Asia, Africa, and Latin America (Sasaki, 2005, FAO 2009).

This species is classified into five subpopulations namely: Indica, Aus, Aromatic, Tropical Japonica, and Temperate Japonica (Garris *et al.*, 2005).

Rice breeding in the past has focussed on augmented the harvested index and solar radiation capture, achieving a significant increase of yield across time.

This advanced was supported, mainly, to the modified ideotype in the green revolution and improvement in agronomic practices.

Rice breeders have developed a new plant type, that improvement the past ideotype, adapting it for direct seeding. This new plant type design is characterized by reduced tillering capacity, large panicle size, lodging resistance, and specific arrangement of the three top leaves (Peng *et al.*, 2004). These traits, large panicle size and arrangement of the top three leaves they aim to increment the sink size and the source of photoassimilates.

Photoassimilates are generated in the process namely photosynthesis which consists of the one light phase and another dark phase. In the light phase, photons are trapped by pigments and transport across the photosystem II (PSII) and I (PSI) in the called electron transport chain to produce NADPH and ATP.

Rice is a C3 plant where photosynthesis is limited to use solar radiation because of the importance of the photorespiration that enhancer the dissipation excess energy (Murchie *et al.*, 2015; Zhu *et al.*, 2010). Then, the control of the electron transport rate of the chain electron transport is a fundamental concept in the regulation of photosynthesis (Foyer *et al.*, 2002).

Chlorophyll fluorescence is an important tool to investigate the behavior of the photosynthetic capacity and potential, this technique is as a window inside to the heart of the photosynthetic process (Stirbet and Govindjee 2011).

Different approaches have been realized to measure chlorophyll fluorescence, based on the Kautsky effect. Among them is the called OJIP analysis, which is based on the fluorescence transient of the PSII chlorophyll fluorescence and the terms concern to basal fluorescence level ( $F_0$ ), two intermediate steps namely J and I and a maximum fluorescence level ( $F_p = F_m$ ) (Strasser *et al.*, 2000).

Basal fluorescence level  $F_0$  indicated that all reaction center (RC) is open and it is assumed that at  $F_m$  levels all RC is closed.

The J step occurs at 2ms from  $F_0$  and is related to reduction of the primary quinone electron acceptor  $Q_A$  reduction, while I step occurs at the 20ms and is related to the  $Q_B$  reduction. Data fluorescence is recorder as  $F_J$  and  $F_I$ , whilst data as fluorescence at 300 $\mu$ s and is used to calculate the initial slope  $M_0$  that indicates the net ratio of RCs closure.

On another hand, the difference between  $F_0$  and  $F_m$  is called fluorescence variable ( $F_v$ ) and the ratio between  $F_v$  and  $F_m$  ( $F_v/F_m$ ) is related to the maximum quantum yield of primary PSII photochemistry, also expressed as the ratio JTR/JABS (Strasser *et al.*, 2000).

Other important parameters obtained from the OJIP analysis are the area over the curve namely  $S_m$  that indicates a bulk of electron acceptors presented and the normalized  $S_m/F_v$  indicates the energy need to close all RCs or the electron acceptors per active electron transport chain (Stirbet and Govindjee 2011).

Other authors introduced a new parameter called performance index on energy absorbed ( $PI_{abs}$ ). This index is calculated with three components that included density of reaction center per energy absorbed basis, energy trapping efficiency and the electron transport efficiency and can be defined as a performance index for energy conservation from photons absorbed by PSII antenna, to the reduction of  $Q_B$  (Srivastava *et al.*, 1999).

These and other parameters calculated of the OJIP analysis allow a deep examination of the functionality of PSII and are an approach to understand the genetic variability intra/interspecies.

The genetic resources and chance to use this diversity depend on the ability to understanding the genetic base of those traits.

Quantitative trait loci (QTL) were used extensively to explore the genetic basis of the important agronomic trait. This QTL analysis developed through linkage mapping is a very time-consuming approach due to the inbreeding line must be obtained and constructing by linkage mapping. Moreover, the QTL acquired they come off the narrow genetic basis, hindering the use in the breeding program.

In recent years, the new technique to obtained QTL and molecular markers for use in plant breeding has been developed. This technique is based on the linkage disequilibrium and required a high number of genotypes with a spread genetic basis (Yang *et al.*, 2018) and is called the genome-wide association study (GWAS).

In rice, numerous populations were sequenced and used in studies of GWAS as the RDP1 and RDP 1+2 consisting of 421 y 1571 accessions respectively (McCouch *et al.*, 2016), two populations development in the National Center of Plant Gene Research with 533 and 950 accessions (Huang *et al.*, 2012) and the 3243 rice accessions belonging to 3000 rice genome project (Li *et al.*, 2014).

The study of these sequenced populations allowed the development of the great number of GWAS that covering diverse agronomic traits as heading date, plant height, grain length, spikelets for panicle, etc. (Xie *et al.*, 2015; Crowell *et al.*, 2016; Spindelet *et al.*, 2015; Begum *et al.*, 2015; Zhao *et al.*, 2011; Biscarini *et al.*, 2016; Hu *et al.*, 2016; Han *et al.*, 2016), diverse biotic and abiotic stress (Li *et al.*, 2017; Shakiba *et al.*, 2017; Kang *et al.*, 2016; Kumar *et al.*, 2015; Lafarge *et al.*, 2017; Shi *et al.*, 2017; Kadam *et al.*, 2018; Pantalião *et al.*, 2016; Ma *et al.*, 2016) and diverse physiological traits (Yang *et al.*, 2018; Yang *et al.*, 2018; Mogga *et al.*, 2018; Quero *et al.*, 2018).

Furthermore, currently, a great interest in describing rice phenotypes that may have better efficiency in the electrons transport (Meacham *et al.*, 2017). In line with the above, there are reports in rice that describe the relationship between PSII activity and grain yield (Wang *et al.*, 2014; Zhang *et al.*, 2015).

In the present study, we applied GWAS mapping to investigate the genetic architecture of PSII efficiency under two environmental conditions and evaluated the interaction between the behaviour of PSII and yield components. We analyzed PSII efficiency in RDP 1 population with highly diverse rice genotypes; these populations were genotyped with 700,000 SNPs markers (Crowell *et al.*, 2014). Indeed, these results are discussed in the context of the rice PSII efficiency and they translated into yield.

## 2. Material and methods.

### 2.1 GWAS germplasm selection.

A collection of 283 accessions, belonging to the RDP-1 panel, representing the five major subpopulations in *O. Sativa* genotyped to 700,000 SNPs (Crowell *et al.*, 2016) was used. The accessions selected from the rice subpopulations were 45 *aus*, 59 *indica*, 58 *temperate japonica*, 76 *tropical japonica*, 8 *aromatics*, and 37 *admixed*.

### 2.2 Experimental design and locations.

The seeds were sown in Petri dishes on filter paper, rinsed with 7 mL carbendazim 0.025 %p/v, and incubated at 30°C in darkness during three days until germination. The seedlings were cultured in a growth chamber with 28/24 °C day/night temperatures, 12-12h photoperiod 240  $\mu\text{mol photons m}^{-2} \text{s}^{-1}$  of photosynthetically active radiation (PAR) and, 60% average humidity. The seedling was growing in hydroponically conditions with nutritive Yoshida solutions (Yoshida *et al.*, 1976). After two weeks germination seedling was transplanting to field conditions in pots containing mineral soil. The accessions were planted in a randomized complete form with three replications.

Field experiments were conducted at two locations, INTECH, Chascomús- Buenos Aires (35.623048 -57.994167, CH), and EEA INTA Concepción del Uruguay, Entre Ríos (32.490254, -58.348855, ER). Both experiments were performed in the summer season 2017/2018. The physiological measurements were performed in plants of 11 old-weeks and all plants are in the tillering stage.

### 2.3 Chlorophyll transient fluorescence measurements (OJIP test) and SPAD.

Fluorescence transient was measured in the uppermost fully expanded leaf. Measurements were taken with a plant efficiency analyzer (Handy PEA fluorometer, Hansatech Instruments Ltd., King's Lynn, Norfolk, UK), according to the protocol used for the so-called double-hit experiments (Appenroth *et al.*, 2001). Leaves were dark-adapted by 20 minutes using a leaf clip provided by the manufacturer. Then, leaves were exposed twice for 1 s with 3000  $\mu\text{mol photons m}^{-2} \text{s}^{-1}$  (650 nm peak wavelengths) with a dark interval of 0.5 seconds. In this line, the data become for the first hit was extracted and used as a phenotypic fluorescence trait.

The fraction of  $Q_b$  reducing centers ( $Q_b\text{RC}$ ) can be calculated as follows:

$$Q_b\text{RC} = [1 - (F_0 / F_M)_{(2^{\text{nd}} \text{ hit})} / 1 - (F_0 / F_M)_{(1^{\text{st}} \text{ hit})}] = \phi_{po}^* / \phi_{po}$$

$$\text{Non- } Q_b\text{RC} = 1 - \phi_{po}^* / \phi_{po} = 1 - Q_b\text{RC}$$

The PEA plus software (PEA Plus software, Hansatech Instruments Ltd., UK) was used to analyze the PSII parameters according to Strasser *et al.* (2000). The different OJIP parameters are present in Table 1.

To estimate leaf total chlorophyll content, a SPAD chlorophyll meter was used (Cava-devices, CABA, AR). For each leaf, the chlorophyll content was estimated as the mean of five chlorophyll content measurements at different positions in the middle section of the leaf.

### 2.4 Determination of yield components

Plants were harvested at the maturation stage. The panicles were threshed manually and processed by a hulling machine JLGJ-45 (JinGao, Cn) and the following yield components were measured: the weight of one thousand grain (WTG), number of panicle per plant (PN), number of spikelets per panicle (NSP), panicle weight (PW) calculated as the weight of filled grains per panicle, percentage of fertile and infertile spikelets (%F and %In respectively). All dates are an average of total panicles per plant replications.

## 2.5 GWAS mapping.

The GWA studies were performed based on the HDRA data set consisting of 700,000 SNPs (McCouch *et al.*, 2016). Phenotypic grand means for each variety were used in the mapping models. GWAS was performed using a linear mixed model with EMMAX algorithm (Kang *et al.*, 2010), which takes the underlying population structure into account by including two kinship matrix (hBN and hBS) as a covariate.

The maximum rates of missing data were fixed at 10% per accessions and 25% per SNP. A minor allele frequency threshold of 0.05 (MAF<0.05) was applied to discard markers with very rare alleles according to Aulchenko *et al.* (2007). The significance threshold was set at  $p < 1.28 \times 10^{-7}$  for every trait, using Bonferroni criteria.

## 2.6 Linkage disequilibrium

GWAS Linkage disequilibrium (LD) between markers on each chromosome was calculated using pairwise  $r^2$  between SNPs. First, we performed LD, calculated using the `--r2 --ld-window 99999 --ld-window-r2 0` commands in PLINK (version 1.9) (Chang *et al.*, 2015).

The critical threshold used was 0.2 (McCouch *et al.*, 2016). Then, for each significant marker, we computed LD upstream and downstream on the same chromosome as a mean LD value through plotting  $r^2$  1,000 SNPs of each chromosome versus genetic distance between markers we defined both boundaries of the confident interval as the intersection of the 'critical LD' threshold and the fitted curve of  $r^2$  regression (See Supplementary. Fig.1). A nonlinear model described by Remington *et al.* (2001) was used to fit the LD decay. The R function NLS (nonlinear least-squares method) was used to fit the model. The number of genes within each interval was identified from the rice genome.

## 2.7 Statistical analyses.

Histograms, boxplots, correlations and GWAS analyses were constructed using phenotypic grand means for each variety. Manhattan plot and Qqplots (Suppl. Figure 2 and 3) were created using the package qqman() in R (Rebolledo *et al.*, 2015). *P*-values for Pearson's correlation coefficients were calculated with a two-sided t-test using the cor.test() function in R.

Analysis of variance was performed for genotype, environment, and genotype x environment using the lme4 function in R (Bates *et al.*, 2015).

## 2.8 Gen candidate analysis

A list of the candidate gene was constructed in the base to gen functional notation utilizing the Rice Gene Annotation Project database ([http://rice.plantbiology.msu.edu/cgi-bin/batch\\_download.pl](http://rice.plantbiology.msu.edu/cgi-bin/batch_download.pl)).

Also, an enrichment analysis of the GO terms (Gene Ontology) was performed, using the agriGO analysis tool (<http://systemsbiology.cau.edu.cn/agriGOv2>; Du *et al.*, 2010). In this analysis, the list of gen candidates derived from the GWAS mapping was used utilizing the Oryza Sativa LMSU database with agriGO as a reference. The analysis was carried out using Fisher's statistical method to detect significantly enriched ontological terms. The transcription factors (TF) identified were classified according to the PlnTFDB web tool (the PlantTranscription Factor Database; <http://plntfdb.bio.uni-potsdam.de/v3.0>; Pérez-Rodríguez *et al.*, 2009)

## 3. Results

### 3.1 Phenotype and population structure.

The rice diversity panel RDP-1 consists of 435 inbred accessions of *O. sativa* that come from 82 different countries (Zhao *et al.*, 2011). In this study, a part of the RDP-1 was cultivated under field conditions in two different environmental locations, Chascomús (CH) and Entre Ríos (ER). Then, 283 plant accessions (from those above), were phenotyping at vegetative stage for photosynthetic traits (PT) by measuring the fluorescence transient of chlorophyll a and the SPAD index. On the other hand, a principal component analysis (PCA) was used to describe the overall genetic variation in the RDP-1. The population presented a clear structuring of the accessions analyzed caused by the environmental condition (Fig. 1). The top two principal components (PCs) explain 95.17% of the genetic variation within the panel (Figure 1). A total of 29 PT were measured for 283 accessions in RDP-1 at the vegetative stage and they were used for the GWAS analysis, in which all rice subpopulations were represented: 45 aus, 59 indica, 58 temperate japonica, 76 tropical japonica, 8 aromatic and 37 admixed. A brief description of the traits evaluated is summarized in Table 1. In this sense, the analysis of variance (ANOVA) showed significant effects on the genetic component (G), the environmental factor (E), and their interaction (GxE) (Table 1). However, some exceptions were the RE<sub>0</sub>/CS and  $\delta(R_0)$  traits, that not showed significant E effects. In line with this the P<sub>I</sub>total not presented significant differences in G, E and GxE interaction (Table 1).



### 3.2 Genome-wide association analysis.

After filtering, the set of markers was constituted of 388,084 SNPs with MAF  $\geq$  5%, within the 12 rice chromosomes. A total of 110 significant SNPs-trait associations were identified, intersecting both sets of significant associations (obtained with hBS and hBN matrices, mention above). Moreover, 11 of these significant SNP-trait associations corresponded to the cultivation plants in CH environment, while 99 significant SNP-trait associations belonged to plants grown in the ER environment (Table 2). Interestingly these associations being unique for each environment, presenting none SNP in common between CH and ER. Likewise, of the total fluorescent phenotypes evaluated here, 5 of them registered significant associations in both environments with SNPs ( $F_o/F_m$ ,  $F_v/F_m$ ,  $DI_o/RC$ ,  $\delta(R_o)$ , and  $PI_{abs}$  (Table 2) in both environments of the PT analyzed, only the chlorophyll fluorescence phenotypes showed significant associations with SNPs. In line with this, 6 significant fluorescent phenotype associations were detected in CH environment, while in ER environment, a total of 13 phenotypes were significantly associated with some SNPs (Fig. 2A-B; Table 2). The plants growing in the CH environment showed a lower mean value of the  $F_v/F_m$  and  $PI_{abs}$  traits than ER environment, with differences of 7.23% and 57.27% respectively (Fig. 2). However, other phenotypes like  $F_o/F_m$ ,  $DI_o/RC$ , and  $\delta(R_o)$  of the plants grown in CH showed higher average values compared to the ER environment. These differences being 26.17% for the  $F_o/F_m$ , 31.55% for the  $DI_o/RC$ , and 31.77% for the  $\delta(R_o)$  (Fig. 2).

On the other hand, among the 110 SNPs mapped here for both environments, 70 SNPs were associated with a single locus trait (Table 2). In this sense, others 11 associations found for CH, the  $F_o/F_m$ ,  $F_v/F_m$ ,  $DI_o/RC$ , and  $DF_{abs}$  phenotypes mapped in the same SNP, SNP-5.11015630 (Supplementary Table S1), while the 6 associations found for the  $\delta(R_o)$  phenotype were unique for this parameter, as well as the only SNP identified for the  $PI_{abs}$  (Table 2).

Alternatively, in ER environment, 63 SNPs were associated with a single locus respectively (Table 2), as for the CH environment,  $PI_{abs}$  phenotype mapped in a single significant SNP, SNP-1.35479825 (Supplementary Table S1), while other 12 and 4 SNPs were associated together with two and three fluorescence traits respectively (Supplementary Table S1). Among the 28 fluorescence traits analyzed here, the turnover of  $Q_a$  (N) and energy dissipated by active reaction centers of FSII ( $DI_o/RC$ ), were associated with the higher number of SNPs (24 SNPs, Table 2).

Likewise, a total of 69 QTLs were identified for 14 of 29 PT analyzed in both environments tested and belonged to three classes. The first class of QTL was defined as single SNP associated with a unique phenotype, the second class of QTL were those identified SNPs associated with more than one phenotypes (multi-type QTL). Finally, the third class of QTL found corresponded to SNPs

mapped in chromosome region, where two or more SNPs separated by a distance of ~ 55 kb and these were associated with a particular phenotype (QTL multi SNP). In line with this, the CH environment, presented a single multi-type QTL on chromosome 5 (Fig. 3A), where a single SNP was associated with the  $F_o/F_m$ ,  $F_v/F_m$ ,  $DI_o/RC$ , and  $DF_{abs}$  traits (SNP- 5.11015630).

On the other hand, for the ER environment, 4 multi-type QTLs were identified on chromosomes 2, 3, 4, and 6 (Fig. 4A), where the  $RE_o/RC$ , N, and Sm phenotypes shared the SNP-2.18755532 (Supplementary Table S1). At the same time, the  $\delta(R_o)$ ,  $DI_o/CS$ , and  $DI_o/RC$  phenotypes shared the SNP, SNP-3.7631091. In turn, the  $DI_o/RC$  phenotypes shared SNP-4.3532129 with the N and  $RE_o/RC$  phenotypes. Finally, the  $F_o/F_m$ ,  $F_v/F_m$ , and  $\delta(R_o)$  traits were jointly associated with the locus SNP-6.21617771 (Fig. 4A; Supplementary Table S1).

Besides, another 4 QTL multi-types were identified for  $S_m$  and N on chromosomes 1, 4, 5, and 10 (SNPs 1.32181171, 4.19830956, 5.13606968 and 10.2073752). In addition one more multi-type QTL of interest was found for the energy dissipation phenotypes  $DI_o/RC$  and  $DI_o/CS$ , on chromosome 11; SNP11.9898109 (Fig. 4A). Finally, 5 QTL multi SNPs were detected, 3 of these were associated with  $DI_o/RC$  trait on chromosomes 1, 3, and 5 (Fig. 4A), and other one for the  $Q_bRC$  onto chromosomes 12 (Fig. 4B). The remaining 59 QTLs identified corresponded to the single SNP class (Fig. 4A-B).

### 3.3 Identification of candidate genes.

The genome browser feature of Rice base "Rice Annotation Project" <http://rice.plantbiology.msu.edu/index.shtml>, was used to identify candidate genes based on the MSU7 gene annotation. The selection of candidate genes was underlined for each QTL accordingly the linkage disequilibrium (LD) (Supplementary Table S2). These genes were classified accordingly their Gene ontology (GO) term. Subsequently the enrichment analysis of the list of total candidate genes showed a significant proportion of genes involved on molecular functions related to cell biosynthesis (GO: 0044249), metabolic regulation processes (GO: 0019222), regulation of gene expression and macromolecular processes (GO: 0010468, GO: 0060255), processes related to cell death (GO: 0008219), macromolecule cell biosynthesis (GO: 0034645), and macromolecule biosynthesis (GO: 0009059) also showed significant enrichment (Table 3). Furthermore the most represented terms linked to biological processes were related to hydrolysis processes of acids, phosphate and ester groups (GO: 0016817, GO: 0017111, GO: 0016818, GO: 0016462 and GO: 0016788) and nucleotide-binding (GO: 0000166).

Based on these most representative GO terms, 38 candidate genes were highlighted in Table 4 from the 157 total candidate genes mapped (Supplementary Table S2).

Of those 38 candidate genes 8 genes corresponded to genes associated with response to biotic and abiotic stress (LOC\_Os01g02250, LOC\_Os03g59600, LOC\_Os05g44340, LOC\_Os06g30430, LOC\_Os08g28470, LOC\_Os09g26620, LOC\_Os12g03750, and LOC\_Os12g30150). Also, 5 genes were identified as transcription factors (LOC\_Os03g17130, LOC\_Os03g20900, LOC\_Os05g23780, LOC\_Os05g44400 and LOC\_Os10g39030), one gene was assigned to the Calvin Cycle (LOC\_Os05g44922). Likewise, three identified genes are linked to functions associated with grain characters (LOC\_Os05g02670, LOC\_Os05g44560, and LOC\_Os10g39030); and finally, a gene with functional notation linked to senescence processes (LOC\_Os05g44970). Based on these results, it could be said that the genetic architecture of the functionality of the PSII can be associated at the genetic level mainly with processes linked to grain filling among other processes.

### 3.4 Relationships between panicle traits and FSII parameters.

Six panicle traits were evaluated: Number of Panicle per Plant (PN), Thousand Grain Weight (WTG), Fertility Percentage (%F), Calculated Infertility Percentage (%In), Number of Spikelet per Panicle (NSP) and Panicle Weight (PW).

These panicle traits showed different distribution depending on the environmental condition. Plants grown in the environmental conditions of ER showed higher NP, NSP, %In, and PW compared with plants grown in the CH; these differences were 15.1%, 45.6%, 26.1%, and 27.4% respectively (Fig. 5). Meanwhile, the WTG and %F traits were 10.3% and 19.80% lower for the ER environment compared to the CH environment (Figure 5).

The analyses of Pearson's correlation coefficients were calculated between all the FSII parameters associated with the identified candidate genes (Supplementary Table S3) and panicle traits in both environmental conditions (CH and ER) allowed identifying some significant relationships. The top ranking significantly were: one negative correlation between and a positive correlation with the  $\delta(R_o)$  phenotype in CH condition. Sequentially, the  $\delta(R_o)$  phenotype also showed a positive correlation with the NSP panicle trait (Supplementary Table S3).

On the other hand, the correlation analyses between, panicle traits and FSII parameters for the ER environment were in general significant among themselves. In line with this, the mean of  $r$  Pearsoncoefficient between pairs of fluorescence phenotypes and panicle traits, which were statistically significant was  $r = 0.14$ . For this reason, the correlations that presented an  $r > 0.14$  were analyzed (Supplementary Table S3).

From the correlation diagram (Supplementary Table S3), it can be seen that the %In trait correlates positively with the N and  $DI_o/RC$  phenotypes. Also, the NSP trait correlated positively with the  $RE_o/RC$  phenotype, correlated negatively with the  $PI_{total}$  phenotype. On the other hand, the PW panicle trait presented 4 significant correlations with fluorescence phenotypes, which is the trait that presented the greatest amount of correlations. The four significant correlations, three were negative with the N,  $DI_o/RC$ , and  $PI_{total}$  phenotypes, while the remaining correlation was positive with the  $RE_o/RC$  phenotype.

On the other hand, the WTG and %F traits correlated significantly with the same fluorescence, N, and  $DI_o/RC$  phenotypes; being in both cases negative correlations. Finally, the PN panicle trait only correlated significantly and negatively with the  $PI_{total}$  fluorescence phenotype.

#### 4. Discussion

Mapping genetic regions that control quantitative features of PSII functionality is a difficult task because photosynthetic processes have a complex and polygenic architecture. Our results showed a clear effect of the environment on the population genetic structure evidenced by the segregation into two groups of different individuals represented by plants grown in the CH and ER environments (Fig. 1).

In plants, chlorophyll fluorescence has been used extensively to examine the influence of abiotic stresses on light-dependent reactions (Fracheboud *et al.*, 1999; Huang *et al.*, 2004; Silvestre *et al.*, 2014; Rachoski *et al.*, 2015). However, despite the versatility of the use of chlorophyll fluorescence as a rapid phenotyping method, and of great capacity to evaluate numerous plant accessions, few reports study the mapping of regions or the genetic variation of fluorescence phenotypes in environmental conditions. Nonetheless, QTL for photosynthetic phenotypes associated with light reactions has been successfully mapped in some species of agronomic importance such as wheat, corn, soybeans, and sorghum (Šimić *et al.*, 2014; Herritt *et al.*, 2016; Ortiz *et al.*, 2017).

The reactive processes of the PSII are sensitive to light, and in turn, the light that impacts the PSII depends strongly on the environmental conditions. The natural variations are an important approach to identify new genetic determinants to improve the efficiency of the use of crop light. Since the phenotypic variation of the functionality of the photosynthetic apparatus (PA) of the RDP-1 was measured under normal non-stressful conditions in two environmental locations and the environmental impact on the genetic architecture of the PA could be assessed. Our results showed that fluorescence phenotypes evaluated are highly influenced by genotype, environmental conditions, and genotype-environment interaction (Table 1). Similar results were found in studies

in soybean, where chlorophyll fluorescence phenotypes were analyzed in various environments (Herritt *et al.*, 2016). On the other hand, in rice, the analysis of other photosynthetic parameters such as stomatal conductance (Gs), net photosynthesis (Asat), and photochemical performance Fv/Fm were affected by environmental, genotypic factors and their interaction between them (Qu *et al.*, 2017). In other words, our results show that the significant natural variation in each chlorophyll fluorescence phenotype observed among a plethora of rice genotypes indicates that the selection of these photosynthetic features as an improvement criterion could be possible.

In this sense, of the significant phenotypes found in both environments  $F_o/F_m$ ,  $F_v/F_m$ ,  $DI_o/RC$ ,  $PI_{abs}$  and  $\delta(R_o)$ , it was observed that the average values obtained for the ER environment were higher compared to the CH (Fig. 2A-B). In this line, the  $F_o/F_m$  phenotype is the basis of all the expressions derived from the OJIP test. This phenotype allows the phenomenological quantification of the fluorescence behavior of a sample, and at the same time, compares and classifies different types of samples (Strasser *et al.*, 2000). The phenotype Fv/Fm is used to quantify the physiological state of plants (Baldassarre *et al.*, 2011). The phenotype  $PI_{abs}$  indicates the status of FSII, from the absorption of a photon by FSII to the reduction of  $Q_b$  (Stirbet and Govindjee 2011). Finally, the  $DI_o/RC$  and  $\delta(R_o)$  phenotypes explain the energy dissipation by active reaction center and the efficiency of electron transport to the last FSI acceptor respectively (Stirbet *et al.*, 2018).

GWAS studies using chlorophyll fluorescence under optimal stress and growth conditions have been reported in soybeans, corn, and sorghum (Hao *et al.*, 2012; Strigens *et al.*, 2013; Fiedler *et al.*, 2016). In all cases, the photosynthetic phenotype features were associated with multiple regions within the genome. Results of the present work yielded 110 QTL in all chromosomes and even the same phenotype was associated in more than one region within the same chromosome according to those previous reports (Fig. 3A; 4A-B). Particularly for the CH environment, a QTL was identified on chromosome 9 for the  $PI_{abs}$  phenotype, this phenotype has a unique association on the said chromosome, and in turn, this was the unique association found on this chromosome (Fig. 3B). This fact makes the  $PI_{abs}$  phenotype an interesting study target in plant improvement projects since this type of association is an exception to the results conventionally found in GWAS studies for chlorophyll fluorescence phenotypes.

In addition to the difference in the number of SNPs and the phenotypic variation observed between the environments, and as consequence a greater number of QTL for the ER environment were also identified. In line with those mentioned, GWAS studies in *Arabidopsis thaliana* YELLOW SEEDLING G1 (YS1) revealed diversity in photosynthetic acclimatization under high radiation

conditions, finding a greater amount of QTL than in low radiation conditions (van Rooijen *et al.*, 2017).

The analysis of the QTL for the CH environment yielded a single multi-type QTL on chromosome 5 (Fig. 3), unlike the ER environment where 4 multi-type QTLs could be identified (Fig. 4). In both environments, the  $F_o/F_m$ ,  $F_v/F_m$ , and  $DI_o/RC$  phenotypes share the same QTL on chromosome 5 for plants in CH and chromosome 6 in the ER plants. Identical results were obtained in studies conducted in soybeans (Herritt *et al.*, 2016); where the phenotypes of the relationship between maximum and minimum fluorescence, the maximum quantum yield of PSII, and energy dissipation per active reaction center share the same region within the chromosome.

The regions of the genome found by molecular markers for fluorescence phenotypes contained groups of genes that are important for the metabolic and molecular functioning of rice. Additionally, these regions encompassed individual genes that have a significant impact on the functions of grain filling, and therefore, the values of some chlorophyll fluorescence phenotypes could directly influence the grain yield of rice. The examination of the genetic annotations linked to the enrichment analysis of GO terms identified in this study revealed 38 candidate genes (Table 4). Of the identified candidate genes, those with catalytic activity notations formed the majority group (Tables 3 and 4).

When analyzing how fluorescence phenotypes are related to the identified genes, it was observed that the  $S_m$  and N phenotypes, in general, are associated with the same identified genes (Table 4). Phenotype N indicates the number of reduction and oxidation events of  $Q_a$  between time zero and  $F_m$  (Strasser *et al.*, 2000). In turn, the  $S_m$  phenotype indicates the energy required for electron transport, and thus, closes all reaction centers (Oukarroum and Strasser 2004), this is equivalent to saying that  $S_m$  indicates the functionality of the quinone complexes ( $Q_a/Q_b$ ). Both phenotypes are highly related to the functioning of the set of quinones, therefore, this may explain that both phenotypes are linked to the same genes. In this sense, of the 5 transcription factors (TF) identified two of them co-located with both phenotypes N and  $S_m$  (LOC\_Os10g39030, LOC\_Os05g23780). The functional notation assigned for the first TF corresponded to the homeobox (HD) domain, while a second TF codes for the OsMADS70-MADS-box family of genes with M-alpha type-box (MADS-BOX). Others GWAS reports for panicle traits in RDP-1 populations mapped genes containing both types of HD and MADS-BOX domains associated with flowering time, and the plant height (Begum *et al.*, 2015).

The HD domain is a highly conserved motive present in many TFs. At the same time, work carried out with mutant rice plants for HD domains in different TFs showed that those HD domains are

essential for the regulation of tillering, sterility and flowering time in rice (Mjomba *et al.*, 2016; Wei *et al.*, 2016). On the other hand, in rice, the FT MADS-BOX besides being involved in the specification of the floral organs has also been involved in several aspects of the growth and development of the plants (Arora *et al.*, 2007). In this sense, Lee *et al.* (2004) showed that mutants of the MADS-BOX family of rice presented a delay in flowering, while in rice plants that overexpressed genes of the MADS-BOX family, extremely early flowering was observed.

Of the remaining three TFs, one is associated with the Q<sub>b</sub>RC phenotype ( $\beta$ Helix-loop-helix) and two identified TFs were associated with DI<sub>o</sub>/RC (GATA zinc finger domain and Myb). In all cases, these TFs were associated with different types of abiotic stress. Besides, DI<sub>o</sub>/RC is also linked to TF HD by co-locating with the N and S<sub>m</sub> phenotypes. Likewise, the DI<sub>o</sub>/RC phenotype presented a large number of identified genes, mainly in plants that were grown in the ER environment. In general, the genes identified were associated only with the DI<sub>o</sub>/RC phenotype. In this sense, the energy dissipation processes have been described as a fundamental mechanism in the photo protection of plants, in response to the excess of light that affects the complex antenna of the chloroplast (Müller *et al.*, 2001).

Among the identified candidate genes associated with the DI<sub>o</sub>/RC, the LOC\_Os05g44922 and LOC\_Os05g44560 genes can be highlighted. For the first of these two genes, the assigned functional notation corresponded to 6-phosphofructokinase (PFK), an intermediate enzyme in the glycolysis pathway conducted by the Calvin cycle. It has been described that PFK is a key intermediary in the synthesis of the main starch component of rice grain (Chang *et al.*, 2017). For the second candidate gene, the functional notation corresponded to the genes of the Kinesin family.

In rice, kinesins are linked to cell division processes and are expressed in both pollen grains and somatic tissues. In turn, studies conducted on rice indicated that genes from the kinesin family regulate plant height and seed length (Zhang *et al.*, 2010; Kitagawa *et al.*, 2010).

Finally, of the two most representative phenotypes evaluated in CH environment,  $\delta(R_o)$  was associated with a gene that contained the kinesin motor domain, a similar result was identified for DI<sub>o</sub>/RC phenotype. Furthermore, the PI<sub>abs</sub> phenotype underlying with LOC\_Os09g26620 *loci* that codes for an auxin-repressed protein. Previous reports showed this gene family regulated tillering (Zhang *et al.*, 2018). In line with the aforementioned, it has been reported that a large number of tillers limit the remobilization of resources generated by photosynthesis to the final destination, the grain, limiting the yield potential, and increasing biomass (Khush, 1995).

The analysis of panicle traits showed a greater accumulation of positive characters such as PN, NSP, and PW in plants grown in the ER, compared with plants grown in CH (Fig.5). However, even though the plants grown in the ER showed a greater number of destinations in their panicle features, they presented a higher % In (Fig. 5). The higher %In could be that for the ER environment the variability of genotypes that managed to reach the reproductive stage was more diverse within the sub-populations of the RDP-1.

From the correlation diagram for CH (Supplementary Table S3), it was observed that the  $PI_{abs}$  phenotype correlated negatively with the NP trait or what is equivalent to saying that when  $PI_{abs}$  increase there are fewer panicles per plant. This result coincides with the lower value of NP found in CH plants compared to plants grown in ER (Fig. 5) and with the function described for the identified gene linked to this phenotype. In concordance it has been reported that a greater tendency of plants to increase their tillering allocates photosynthetic resources to generate biomass at the expense of limiting resources destined to the panicle (Khush, 1995). Concerning the  $\delta(R_o)$  phenotype, this correlated negatively with NSP and positively with NP. Again, these results are consistent with the underlying gene identified for this phenotype, the kinesins, whose main function is cell proliferation since a higher value of  $\delta(R_o)$  has a higher PN, although a lower NSP.

Alternatively in the ER location, the N parameter evaluated, negatively correlated with the panicle, PW, WTG, and % F characters, positively with the %In trait, in turn,  $RE_o/RC$  positively correlated with NSP and PW (Supplementary Table S3), indicating that a lower number of reduction and oxidation cycles of  $Q_a$  and greater electron transport favors panicle performance. Finally, the  $DI_o/RC$  phenotype showed the same correlations as for the N phenotype. These phenotypes were linked to genes described as essential for grain yield. Energy dissipation has been described as a photo protection mechanism to optimize photosynthetic efficiency at the canopy level achieving an increase in biomass and yield in rice (Murchie *et al.*, 2015).

In conclusion, this work contributed with the identification of genetics determinants of chlorophyll fluorescence diversity in rice by GWAS at two contrasting conditions and how these FSII parameters are related with panicle characteristics. Manifold genes, SNP, and QTL identified here may serve for the design of molecular markers and contribute to the assistance of breeding programs of this species.

The improvement of the photosynthesis capacity in rice constitutes a goal to increased field yields and this work could contribute to it.



## Supplementary data:

**Supplementary Figure 1:** Graph of LD vs Genetic distance. The figure shows the graphic analysis of chromosomes 1 to 12.

**Supplementary Figure 2:** Quantile-Quantile graph (QQplot) for the CH environment. The figure shows the phenotype with significant associations.

**Supplementary Figure 3:** Quantile-Quantile graph (QQ plot) for the ER environment. The figure shows the phenotype with significant associations.

**Supplementary Table 1:** Significant associated SNPs markers to PSII identified by GWAS analysis. SNPs linked to their respective fluorescence phenotype, environment and matrix structure are shown.

**Supplementary Table 2:** Total candidate genes identified by GWAS analysis in CH and ER environments.

**Supplementary Table 3:** Correlation diagram between Panicle traits and PSII fluorescence phenotypes for the Ch and ER environment. Asterisks indicate significant correlation according to the Pearson pairwise correlation method (\*  $p < 0.05$ ).

## Data availability statement:

All data supporting the findings of this study are available within the paper and within its supplementary materials published online.

## Acknowledgments:

This work was supported by grant StartUp 2013 0399 provided by Agencia Nacional de Promoción Científica y Técnica (ANPCyT). This work is part of the PhD thesis of JMV.

## Author contribution

JMV, EB, MLP, AAR, and SJM: investigation

JMV, EB, and SJM: formal analysis, writing.

AAR: funding acquisition

AL, JC, and OAR: resources

FC: validation

SJM: conceptualization

## References:

**Appenroth K, Sto J.** 2001. Multiple Effect of Chromate on the Photosynthetic Apparatus of *Spirodela Polyrhiza* as Probed by OJIP Chlorophyll a Fluorescence Measurements. *Environmental Pollution* 115 (1),49-64.

**Arora R, Agarwal P, Ray S, Singh A, Singh V, Tyagi A, Kapoor S.** 2007. MADS-Box Gene Family in Rice: Genome-Wide Identification, Organization and Expression Profiling during Reproductive Development and Stress. *BMC Genomics* 8, 242-253.

**Aulchenko YS, Ripke S, Isaacs A, van Duijn CM.** 2007. GenABEL: An R library for genome-wide association analysis. *Bioinformatics* 23:1294–1296.

**Baldassarre V, Cabassi G, Ferrante A.** 2011. Use of Chlorophyll a Fluorescence for Evaluating the Quality of Leafy Vegetables. *Australian Journal of Crop Science* 5 (6), 735–741.

**Bates Det al.** 2015. Fitting linearmixed-effects models using lme4. *Journal of Statistical Software*, 67(1), 1–48.

**Begum H, Spindel J, Lalusin A, Borromeo T, Gregorio G, Hernandez J, Virk P, Collard B, McCouch SR.** 2015. Genome-wide association mapping for yield and other agronomic traits in an elite breeding population of tropical rice (*Oryza sativa*) PLoS ONE 1 doi: 10.1371/journal.pone.0119873.

**Biscarini F, Cozzi P, Casella L, Riccardi P, Vattari A, Orasen G, Perrini R, Tacconi G, et al.** 2016. Genome-Wide association study for traits related to plant and grain morphology, and root architecture in temperate rice accession. *PLOS One* doi: 10.1371/journal.pone.0155425

**Chang CC, Chow CC, Tellier LCAM, Vattikuti S, Purcell SM, Lee JJ.** 2015. Second-generation PLINK: rising to the challenge of larger and richer datasets. *Gigascience* 25;4:7. doi: 10.1186/s13742-015-0047-8.

**Chang T, Liu C, Lin Y, Li C, Wang A, Chien M, Wang C, Lai C.** 2017. Mapping and Comparative Proteomic Analysis of the Starch Biosynthetic Pathway in Rice by 2D PAGE/MS. *Plant Molecular Biology* 95 (4–5) 333–343.

**Crowell S, FalcaoA, Shah A, Wilson Z, Greenberg A, McCouch S.** 2014. High-Resolution Inflorescence Phenotyping Using a Novel Image-Analysis Pipeline, PANorama. *Plant Physiology* 165 (2): 479–95. <https://doi.org/10.1104/pp.114.238626>.

**Crowell S, Korniliev P, Falcão A, Ismail A, Gregorio G, Mezey J, McCouch.** 2016. Genome-wide association and high-resolution phenotyping link *Oryza sativa* panicle traits to numerous trait-specific QTL clusters. *Nature Communications* doi :10.1038/ncomms10527.

**FAO.**2009. Increasing Crop Production Sustainably. The Perspective of Biological Processes (Food and Agriculture Organization of the United Nations, Rome.

**Fiedler K, Bekele W, Matschegewski C, Snowdon R, Wieckhorst S, Zacharias A, Uptmoor R.** 2016. Cold Tolerance during Juvenile Development in Sorghum: A Comparative Analysis by Genomewide Association and Linkage Mapping. *Plant Breeding* 135 (5), 598–606.

**Foyer C, Vanacker H, Gomez L, Harbinson J.** 2002. Regulation of Photosynthesis and Antioxidant Metabolism in Maize Leaves at Optimal and Chilling Temperatures: Review. *Plant Physiology and Biochemistry* 40 (6–8), 659–68.

**Fracheboud Y, Haldimann P, Leipner J, Stamp O.** 1999. Chlorophyll Fluorescence as a Selection Tool for Cold Tolerance of Photosynthesis in Maize (*Zea Mays* L.). *Journal of Experimental Botany* 50 (338), 1533–1540.

**Garris, Amanda J, Tai T, Coburn J, Kresovich S, McCouch S.** 2005. Genetic Structure and Diversity in *Oryza Sativa* L. *Genetics* doi: org/10.1534/genetics.104.035642.

**Hao D, Chao M, Yin Z, Yu D.** 2012. Genome-Wide Association Analysis Detecting Significant Single Nucleotide Polymorphisms for Chlorophyll and Chlorophyll Fluorescence Parameters in Soybean (*Glycine Max*) Landraces. *Euphytica* 186 (3), 919–31.

**Han Z, Zhang B, Zhao H, et al.** 2016. Genome-wide association studies reveal that diverse heading date genes respond to short and long daylengths between indica and japonica rice. *Frontier in Plant Science* doi:10.3389/fpls.2016.01270.

**Herriott M, Dhanapal A, Fritsch F.** 2016. Identification of Genomic Loci Associated with the Photochemical Reflectance Index by Genome-Wide Association Study in Soybean. *The Plant Genome* 9 (2):1-12.

**Hu Y, Huang Y, Zhang L, et al.** 2016. Genome-wide association analysis reveals flowering? related genes regulating rachis length in rice. *Plant Breeding* 135(6), 677-682.

**Huang Z, Jiang D, Yang Y, Sun J, Jin S.** 2004. Effects of Nitrogen Deficiency on Gas Exchange, Chlorophyll Fluorescence, and Antioxidant Enzymes in Leaves of Rice Plants. *Photosynthetica* 42 (3), 357–364.

**Huang X, Zhao Y, Wei X, Li C, Wang A, Zhao Q, Li W, Guo Y, et al.** 2012. Genome-wide association study of flowering time and grain yield traits in a worldwide collection of rice germplasm. *Nature* 44,32-39.

**Kadam N, Struik P, Rebolledo M, Yin X, Jagadich K.** 2018. Genome-wide association reveals novel genomic loci controlling rice grain yield and its component traits under water-deficit stress during the reproductive stage. *Journal of Experimental Botany* 69 (16), 4017–4032.

**Kang H, Wang Y, Peng S, et al.** 2016. Dissection of the genetic architecture of rice resistance to the blast fungus *Magnaportheoryzae*. *Molecular Plant Pathology* doi: 10.1111/mpp.12340

**Kang HM, Sul JH, Service SK, Zaitlen NA, Kong SY, Freimer NB, Sabatti C, Eskin E.** 2010. Variance component model to account for sample structure in genome-wide association studies. *Nature Genetics* doi: 10.1038/ng.548

**Kumar V, Singh A, Mithra S, et al.** 2015. Genome-wide association mapping of salinity tolerance in rice (*Oryza sativa*). *DNA Res.* 22 (2), 133–145.

**Khush G.** 1995. Breaking the Yield Barrier of Rice. *Geo. J.* Vol. 35.

**Lafarge T, Bueno C, Frouin J, Jacquin L, Courtois B, Ahmadi N.** 2017. Genome-wide association analysis for heat tolerance at flowering detected a large set of genes involved in adaptation to thermal and other stresses. *PLoS One* doi:10.1371/journal.pone.0171254.

**Lee S, Kim J, Han J, Han M, An G.** 2004. Functional Analyses of the Flowering Time Gene *OsMADS50*, the Putative Suppressor of Overexpression of *CO 1/Agamous-Like 20 (SOC1/AGL20)* Ortholog in Rice. *Plant Journal* 38 (5), 754–764.

**Li J, Wang J, Zeigler R.** 2014. The 3000 genomes project: new opportunities and challenges for future rice research. *GigaScience* 3, 8.

**Li X, Guo Z, Lv Y, et al.** 2017. Genetic control of the root system in rice under normal and drought stress conditions by genome-wide association study. *PLOS Genetics*, doi:10.1371/journal.pgen.1006889.

**Ma X, Feng F, Wei H, et al.** 2016. Genome-wide association study for plant height and grain yield in rice under contrasting moisture regimes. *Frontiers in Plant Science* doi:10.3389/fpls.2016.01801

**McCouch S, Wright M, Tung C, Maron L, McNally K, Fitzgerald M, Singh N, et al.** 2016. Open Access Resources for Genome-Wide Association Mapping in Rice. *Nature Communications* doi: org/10.1038/ncomms10532.

**Meacham K, Sirault X, Quick P, Susanne von Caemmerer, and Robert Furbank.** 2017. Diurnal Solar Energy Conversion and Photoprotection in Rice Canopies. *Plant Physiology* 173 (1), 495–508.

**Mjomba FM, Zheng Y, Liu H, Tang W, Hong Z, Wang F, Wu W.** 2016. Homeobox Is Pivotal for *OsWUS* Controlling Tiller Development and Female Fertility in Rice. *G3* 6 (7), 2013–2021.

**Mogga M, Sibiya J, Shimelis H, Lamo J, Yao N.** 2018. Diversity analysis and genome-wide association studies of grain shape and eating quality traits in rice (*Oryza sativa* L.) using DArT markers. PLoS ONE doi:10.1371/journal.pone.0198012.

**Murchie, E, Ali A, Herman T.** 2015. Photoprotection as a Trait for Rice Yield Improvement: Status and Prospects. *Rice* 8 (1), 31.

**Müller P, Li X, Niyogi K.** 2001. Non-Photochemical Quenching. A Response to Excess Light Energy. *Plant Physiology* 125 (4), 1558–1566.

**Ortiz D, Hu J, Salas Fernandez M.** 2017. Genetic Architecture of Photosynthesis in Sorghum Bicolor under Non-Stress and Cold Stress Conditions. *Journal of Experimental Botany* 68 (16), 4545–4557.

**Oukarroum A, Strasser R.** 2004. Phenotyping of Dark and Light Adapted Barley Plants by the Fast Chlorophyll a Fluorescence Rise OJIP. *South African Journal of Botany* 70 (2), 277–283.

**Pantalião G, Narciso M, Guimarães C, et al.** 2016. Genome wide association study (GWAS) for grain yield in rice cultivated under water deficit. *Genetica* 144, 651–664.

**Peng S, Ismail A.** 2004. Physiological basis of yield and environmental adaptation in rice. In: Nguyen HT, Blum A, eds. *Physiology and biochemistry integration for plant breeding*. New York: Marcel Dekker, 83–140.

**Purcell S, Neale B, Todd-Brown K, Thomas L, Ferreira M, Bender D, Maller J, et al.** 2007. PLINK: A Tool Set for Whole-Genome Association and Population-Based Linkage Analyses. *American Journal of Human Genetics* doi: org/10.1086/519795.

**Qu M, et al.** 2017. Leaf Photosynthetic Parameters Related to Biomass Accumulation in a Global Rice Diversity Survey. *Plant Physiology* 175 (1), 248–258.

**Quero R, Gutiérrez E, Monteverde P, et al.** 2018. Genome-wide association study using historical breeding populations discovers genomic regions involved in high-quality rice. *Plant Genome* doi: 10.3835/plantgenome2017.08.0076.

**Rachoski M, Gazquez G, Calzadilla P, Bezus R, Rodriguez A, Ruiz O, Menendez A, Maiale S.** 2015. Chlorophyll Fluorescence and Lipid Peroxidation Changes in Rice Somaclonal Lines Subjected to Salt Stress. *Acta Physiologiae Plantarum* 37, 117.

**van Rooijen R, Kruijer W, Boesten R, van Eeuwijk FA, Harbinson J, Aarts MGM.** 2017. Natural variation of YELLOW SEEDLING1 affects photosynthetic acclimation of *Arabidopsis thaliana*. *Nature Communications* 8: 1421.

**Rebolledo MCet al.** 2015. Phenotypic and genetic dissection of component traits for early vigour in rice using plant growth modelling, sugar content analyses and association mapping. *J Exp Bot* 66(18):5555

**Remington D et al.** 2001. Structure of linkage disequilibrium and phenotypic associations in the maize genome. *PNAS* 98 (20), 11479-11484.

**Sasaki T.** 2005. The map-based sequence of the rice genome. *Nature* 436: 793-800.

**Šimić D, Lepeduš H, Jurković V, Antunović J, Cesar V.** 2014. Quantitative Genetic Analysis of Chlorophyll a Fluorescence Parameters in Maize in the Field Environments. *Journal of Integrative Plant Biology* 56 (7): 695–708.

**Shakiba E, Edwards J, Jodari F, Duke S, Baldo A, Korniliev P, McCouch S, Eizenga G.** 2017. Genetic architecture of cold tolerance in rice *Oryza sativa* determined through high-resolution genome-wide analysis. *PLOS one* doi:12:3 10.1371/journal.pone.0172133.

**Shi Y, Gao L, Wu Z, Zhang X, Wang M, Zhang C, Zhang F, Zhou Y, Li Z.** 2017. Genome-wide association study of salt tolerance at the seed germination stage in rice. *BMC Plant Biology* doi:10.1186/s12870-017-1044-0.

**Silvestre S, de Sousa Araújo S, VazPatto M, Marques da Silva G.** 2014. Performance Index: An Expeditious Tool to Screen for Improved Drought Resistance in the Lathyrus Genus. *Journal of Integrative Plant Biology* 56 (7), 610–621.

**Spindel J, Begum H, Akdemir D, Virk P, Collard B, Redona E, Atlin G, Jannink JL, McCouch S.** 2015. Genomic selection and association mapping in rice (*Oryza sativa*): effect of trait genetic architecture, training population composition, marker number, and statistical model on accuracy of rice genomic selection in elite, tropical rice breeding lines. *PLOS Genetics* doi: 10.1371/journal.pgen.1004982.

**Srivastava A, Strasser R, Govindjee.** 1999. Greening of peas: parallel measurements on 77k emission spectra, OJIP chlorophyll a fluorescence transient, period four oscillation of the initial fluorescence level, delayed light emission, and P700. *Photosynthetica* 37, 365–392.

**Stirbet A, Govindjee.** 2011. On the Relation between the Kautsky Effect (Chlorophyll a Fluorescence Induction) and Photosystem II: Basics and Applications of the OJIP Fluorescence Transient. *Journal of Photochemistry and Photobiology B: Biology* 104 (1–2), 236–57.

**Stirbet A, Lazár D, Kromdijk J, Govindjee.** 2018. Chlorophyll a Fluorescence Induction: Can Just a One-Second Measurement Be Used to Quantify Abiotic Stress Responses?. *Photosynthetica* 56 (1), 86–104.

**Strasser R, Srivastava A, Tsimilli-Michael M.** 2000. The Fluorescence Transient as a Tool to Characterize and Screen Photosynthetic Samples. In: Yunus M, Pathre U, Mohanty P, eds. *Probing Photosynthesis: Mechanism, Regulation & Adaptation*, CRC Press, 445–83.

**Strigens A, Freitag N, Gilbert X, Grieder C, Riedelsheimer C, Schrag T, Messmer R, Melchinger A.** 2013. Association Mapping for Chilling Tolerance in Elite Flint and Dent Maize Inbred Lines Evaluated in Growth Chamber and Field Experiments. *Plant, Cell, and Environment* 36 (10), 1871–1887.

**Wang Y, Zhang J, Yu J, Jiang X, Sun L, Wu M, Chen G, and Chuangen L.** 2014. Photosynthetic Changes of Flag Leaves during Senescence Stage in Super High-Yield Hybrid Rice LYPJ Grown in Field Condition. *Plant Physiology and Biochemistry* 82, 194–201.

**Wei J, Choi H, Jin P, Wu Y, Yoon J, Lee Y, Quan T, An G.** 2016. GL2-Type Homeobox Gene Roc4 in Rice Promotes Flowering Time Preferentially under Long Days by Repressing Ghd7. *Plant Science* 252, 133–43.

**Xie W, Wang G, Yuan M, Yao W, Lyu K, Zhao H, Yang M, Li P et al.** 2015. Breeding signatures of rice improvement revealed by a genomic variation map from a large germplasm collection. *PNAS*, 112 (39), 5411-5419.

**Yang M, Lu K, Zhao F, Xie E, Ramakrishna P, Wang G, Du Q, Liang L et al.** 2018. Genome-Wide Association Studies Reveal the Genetic Basis of Ionomic Variation in Rice. *Plant Cell* 30, 2720-2740.

**Yang X, Xia X, Zeng Y, Nong B, Zhang Z, Wu Y, et al.** 2018. Identification of candidate genes for gelatinization temperature, gel consistency, and pericarp color by GWAS in rice based on SLAF-sequencing. *PLoS ONE* doi:org/10.1371/journal.pone.0196690

**Yoshida S, Forno D, Cock JH, Gomez KA.** 1976. Determination of Sugar and Starch in Plant Tissue. Laboratory. In: IRRI eds. *Manual for Physiological Studies of Rice*. Manila Philippines, IRRI, 46–49.

**Zhang M, Zhang B, Qian Q, Yu Y, Li R, Zhang J, Liu X, Zeng D, Li J, Zhou Y.** 2010. Brittle Culm 12, a Dual-Targeting Kinesin-4 Protein, Controls Cell-Cycle Progression, and Wall Properties in Rice. *Plant Journal* 63 (2), 312–328.

**Zhang M, Shan Y, Kochian L, Strasser R, Chen G.** 2015. Photochemical Properties in Flag Leaves of a Super-High-Yielding Hybrid Rice and a Traditional Hybrid Rice (*Oryza Sativa* L.) Probed by Chlorophyll a Fluorescence Transient. *Photosynthesis Research* 126(2-3), 275-284.

**Zhang N, Yu H, Yu H, Cai Y, Huang L, Xu C, Xiong G, et al.** 2018. A Core Regulatory Pathway Controlling Rice Tiller Angle Mediated by the LAZY1-Dependent Asymmetric Distribution of Auxin. *Plant Cell* 30 (7), 1461–1475.

**Zhao K, Tung CW, Eizenga G, et al.** 2011. Genome-wide association mapping reveals a rich genetic architecture of complex traits in *Oryza sativa*. *Nature Communications* doi: 10.1038/ncomms1467



## Tables:

**Table 1:** Calculations and definitions of fluorescence phenotypes (Strasser *et al.* 2000) and ANOVA analyze of environment (E), genotype (G) and genotype by environment effects on fluorescence phenotypes. Significance of the P-values is given as: \*\*\*  $p < 0.001$ , \*\*  $p < 0.01$ , \*  $p < 0.05$ , ns (no significance).

| Phenotype calculation |                                                        | Definition                                                                                                                                               | G   | E   | GXE |
|-----------------------|--------------------------------------------------------|----------------------------------------------------------------------------------------------------------------------------------------------------------|-----|-----|-----|
| $F_0$                 |                                                        | Minimal fluorescence, when all PSII RCs are open                                                                                                         | *** | *** | *** |
| $F_m$                 |                                                        | maximal recorded fluorescence intensity                                                                                                                  | *** | *** | *** |
| $F_0/F_m$             |                                                        | Relative fluorescence                                                                                                                                    | *** | *** | *** |
| $F_v/F_m$             | $(F_m - F_0)/F_0$                                      | Maximum efficiency of photochemistry                                                                                                                     | *** | *** | *** |
| $S_m$                 | $\int_{F_0}^{F_m} (F_m - F_t) dt / F_m - F_0$          | Area normalized complementary area related to the number of electron carriers per electron carriers chain or energy needed to close all reaction centers | *** | *** | *** |
| $N$                   | $(\text{Area} / (F_m - F_0)) \times M_0 \times (1/VJ)$ | Turn-over number Qa reduction events between time 0 and $F_m$                                                                                            | *** | *** | *** |
| $ABS/RC$              | $M_0 \cdot (1/V_i) \cdot (1/TR_0/ABS)$                 | Energy absorption per reaction center, or size antenna                                                                                                   | *** | *** | *** |
| $DI_0/RC$             | $(ABS/RC) - (TR_0/RC)$                                 | Flux of energy dissipation per reaction center                                                                                                           | *** | *** | *** |
| $TR_0/RC$             | $M_0 \cdot (1/V_i)$                                    | Energy flux trapped per reaction center                                                                                                                  | *** | **  | *** |
| $ET_0/RC$             | $M_0 \cdot (1/V_i) \cdot (ET_0/TR_0)$                  | Energy flux for electron transport per reaction center                                                                                                   | *** | *** | *** |
| $RE_0/RC$             | $(M_0/V_i) \cdot R_0$                                  | The flux of electrons transferred from $Q_a^-$ to final PSI acceptors per active PSII                                                                    | *** | *** | *** |
| $\Psi(E_0)$           | $ET_0/TR_0$                                            | probability that a trapped exciton moves an electron into the electron transport chain beyond $Q_a^-$                                                    | *** | *** | *** |
| $\Phi(E_0)$           | $ET_0/ABS$                                             | Quantum yield for electron transport                                                                                                                     | *** | *** | *** |
| $\delta(R_0)$         | $RE_0/ET_0$                                            | Efficiency with which an electron from $PQH_2$ transferred to final PSI Acceptors                                                                        | *** | ns  | *** |

|                                             |                                                                         |                                                                                                                                                                  |     |     |     |
|---------------------------------------------|-------------------------------------------------------------------------|------------------------------------------------------------------------------------------------------------------------------------------------------------------|-----|-----|-----|
| $\Phi(R_o)$                                 | $RE_o/ABS$                                                              | Quantum yield of electron transport from $Q_a^-$ to final PSI acceptors                                                                                          | *** | *** | *** |
| <b>ABS/CS</b>                               |                                                                         | Energy absorbed per excited cross-section                                                                                                                        | *** | *** | *** |
| <b>DI<sub>o</sub>/CS</b>                    | $(ABS/CS_o) - (TR_o/CS_o)$                                              | Flux of energy dissipation per cross-section                                                                                                                     | *** | *** | *** |
| <b>TR<sub>o</sub>/CS</b>                    | $(TR_o/ABS) \cdot (ABS/CS)$                                             | Energy flux trapped per cross-section                                                                                                                            | *** | *** | *   |
| <b>ET<sub>o</sub>/CS</b>                    | $(TR_o/ABS) \cdot (ET_o/TR_o) \cdot (ABS/CS)$                           | Energy flux for electron transport per cross-section                                                                                                             | *** | *** | *** |
| <b>RE<sub>o</sub>/CS</b>                    | $(RE_o/ABS) \cdot (ABS/CS)$                                             | The flux of electrons transferred from $Q_a^-$ to final PSI acceptors per cross-section                                                                          | *** | ns  | *** |
| <b>RC/(1-RC)</b>                            | $ChlRC/ChlAntenna=RC/ABS$                                               | YRC is the chlorophyll fraction of reaction center and RC/ABS represents the contribution to the PI <sub>ABS</sub> due to the RC density on a chlorophyll basis. | *** | *** | *** |
| <b><math>\Phi_{po}/(1-\Phi_{po})</math></b> | $TR_o/DI_o$                                                             | contribution of the light reactions for primary photochemistry                                                                                                   | *** | *** | *** |
| <b><math>\Psi_{Eo}/(1-\Psi_{Eo})</math></b> | $ET_o/(TR_o - ET_o)$                                                    | contribution of the dark reactions for primary photochemistry                                                                                                    | *** | *** | *** |
| <b>PI<sub>abs</sub></b>                     | $RC/(1-RC) \cdot \Phi_{po}/(1-\Phi_{po}) \cdot \Psi_{Eo}/(1-\Psi_{Eo})$ | Performance index (potential) for energy conservation from photons absorbed by PSII to the reduction of intersystem electron acceptors                           | *** | *** | *** |
| <b>PI<sub>total</sub></b>                   | $PI_{abs} \cdot \delta_{Ro}/(1-\delta_{Ro})$                            | Total performance index on absorption basis                                                                                                                      | ns  | ns  | ns  |
| <b>DF<sub>abs</sub></b>                     | $\log(PI_{ABS})$                                                        | driving force (DF) or logarithm of the performance index for energy conservation from photons absorbed by PSII to reduction $Q_a$                                | *** | *** | *** |
| <b>Q<sub>b</sub>RC</b>                      | $\phi_p^* / \phi_{po}$                                                  | The fraction of QB-reducing reaction                                                                                                                             | *** | *** | *** |
| <b>1-Q<sub>b</sub>RC</b>                    | 1-Q <sub>b</sub> reducing center                                        | The fraction of non-QB reducing reaction                                                                                                                         | *** | *** | *** |
| <b>SPAD</b>                                 |                                                                         | Chlorophyll content                                                                                                                                              | *** | *** | *** |

**Table 2:** Summary of significative associations between SNP and Chlorophyll Fluorescence phenotypes in the environment CH and ER.

| Phenotype    | Chromosome               | Nº SNP | Environment |
|--------------|--------------------------|--------|-------------|
| $F_o/F_m$    | 5                        | 1      | CH          |
| $F_v/F_m$    | 5                        | 1      | CH          |
| $DI_o/RC$    | 5                        | 1      | CH          |
| $DF_{abs}$   | 5                        | 1      | CH          |
| $\delta R_o$ | 3, 4, 5, 6, 7, 8         | 6      | CH          |
| $PI_{abs}$   | 9                        | 1      | CH          |
| $F_o/F_m$    | 6                        | 1      | ER          |
| $F_v/F_m$    | 6                        | 1      | ER          |
| $S_m$        | 1,2,3,4,5,6,10,12        | 9      | ER          |
| $N$          | 1,2,3,4,5,6,7,8,10,11,12 | 24     | ER          |
| $ET_o/RC$    | 3,8,11                   | 3      | ER          |
| $DI_o/RC$    | 1,2,3,4,5,8,10,11,12     | 24     | ER          |
| $RE_o/RC$    | 1,2,3,4,5,7              | 6      | ER          |
| $DI_o/CS$    | 1,2,3,4,6,8,10,11        | 10     | ER          |
| $\delta R_o$ | 3,6,8,10                 | 5      | ER          |
| $PI_{abs}$   | 1                        | 1      | ER          |
| $PI_{total}$ | 2,3,5,6,9                | 6      | ER          |
| $Q_bRC$      | 1,3,4,7,12               | 8      | ER          |
| $1-Q_bRC$    | 1                        | 1      | ER          |

**Table 3:** Enrichment analysis of GO terms based on identified candidate genes: The most statistically representative Go terms are shown.

| GO Term        | Ontology           | Description                                       | Number input list | Number in BG/Ref | p-value               |
|----------------|--------------------|---------------------------------------------------|-------------------|------------------|-----------------------|
| <b>0044249</b> | Molecular Function | Cell Biosynthesis                                 | 13                | 890              | $1,40 \times 10^{-6}$ |
| <b>0019222</b> | Molecular Function | Metabolic Regulation Process                      | 6                 | 188              | $1,80 \times 10^{-5}$ |
| <b>0010468</b> | Molecular Function | Gene Expression Regulation                        | 6                 | 188              | $1,80 \times 10^{-5}$ |
| <b>0060255</b> | Molecular Function | Macromolecular Metabolic Regulation Process       | 6                 | 188              | $1,80 \times 10^{-5}$ |
| <b>0008219</b> | Molecular Function | Cell Death Regulation                             | 8                 | 478              | $6,70 \times 10^{-5}$ |
| <b>0034645</b> | Molecular Function | Macromolecule Cell Biosynthesis                   | 9                 | 890              | $9,30 \times 10^{-4}$ |
| <b>0009059</b> | Molecular Function | Macromolecules Biosynthesis                       | 9                 | 890              | $9,30 \times 10^{-4}$ |
| <b>0016817</b> | Biological Process | Hydrolase activity of anhydrous acid              | 7                 | 109              | $3,80 \times 10^{-8}$ |
| <b>0017111</b> | Biological Process | Nucleoside Phosphatase activity                   | 7                 | 109              | $3,80 \times 10^{-8}$ |
| <b>0016818</b> | Biological Process | Hydrolase activity of phosphorous anhydrous acids | 7                 | 109              | $3,80 \times 10^{-8}$ |
| <b>0016462</b> | Biological Process | Pyrophosphatase activity                          | 7                 | 109              | $3,80 \times 10^{-8}$ |
| <b>0000166</b> | Biological Process | Nucleotide-binding                                | 29                | 3490             | $5,50 \times 10^{-8}$ |
| <b>0016788</b> | Biological Process | Hydrolase activity on ester bonds                 | 6                 | 258              | $1,00 \times 10^{-4}$ |

**Table 4:** Summary of the most important candidate genes identified by GWAS analysis, linked to the most representative Go Terms, Phenotype, Environment, and SNP.

| SNP                                                                   | GO Term                | ID                               | Functional annotation                                               | Environment | Phenotype               |
|-----------------------------------------------------------------------|------------------------|----------------------------------|---------------------------------------------------------------------|-------------|-------------------------|
| SNP-9.16154636                                                        | GO: 0000166            | LOC_Os09g26620                   | Auxin repressed protein                                             | CH          | Plabs                   |
| SNP-5.920701                                                          | GO: 0000166            | LOC_Os05g02670                   | Kinesin motor domain protein                                        | CH          | $\delta(R_o)$           |
| SNP-10.20737522<br>SNP-3.11832167<br>SNP-3.11839954<br>SNP-3.11840203 | GO:0044249             | LOC_Os10g39030                   | Homeobox domain                                                     | ER          | $S_m$<br>N<br>$DI_o/RC$ |
| SNP-5.13606968                                                        | GO:0044249             | LOC_Os05g23780                   | OsMADS70 family of genes - MADS-box with expressed M-alpha-type-box | ER          | $S_m$<br>N              |
| SNP-1.32181171                                                        | GO:0044249             | LOC_Os01g55870                   | Chloroplast precursor of Corismatemutase                            | ER          | $S_m$<br>N              |
| SNP-1.32181171                                                        | GO:0044249             | LOC_Os01g55890                   | Amino acid kinase                                                   | ER          | $S_m$<br>N              |
| SNP-5.26255003.<br>SNP-5.26255003                                     | GO:0044249 GO: 0000166 | LOC_Os05g45340<br>LOC_Os05g45340 | ATP binding protein                                                 | ER          | $DI_o/RC$               |
| SNP-5.25755857                                                        | GO:0044249             | LOC_Os05g44360                   | Oligosaccharide Transferase                                         | ER          | $DI_o/RC$               |
| SNP-3.9505313                                                         | GO:0044249             | LOC_Os03g17120                   | Arginine biosynthesis, argJbifunctional protein                     | ER          | $Q_bRC$                 |
| SNP-3.9505313                                                         | GO:0044249             | LOC_Os03g17130                   | Transcription factor b Helix-loop-helix                             | ER          | $Q_bRC$                 |
| SNP-5.25752878<br>SNP-5.25755857                                      | GO:0044249             | LOC_Os05g44390                   | Peptidyl-tRNA hydrolase                                             | ER          | $DI_o/RC$               |
| SNP-5.25752878<br>SNP-5.25755857                                      | GO:0044249             | LOC_Os05g44400                   | GATA zincfingerdomain                                               | ER          | $DI_o/RC$               |
| SNP-3.11913691<br>SNP-3.11909250                                      | GO:0044249             | LOC_Os03g20970                   | Phospholipid transporter of type ATPase 1                           | ER          | $DI_o/RC$               |
| SNP-3.11832167<br>SNP-3.11840203<br>SNP-3.11839954                    | GO:0044249             | LOC_Os03g20900                   | Myb transcription factor                                            | ER          | $DI_o/RC$               |
| SNP-1.672866                                                          | GO: 0000166            | LOC_Os01g02250                   | RGA-1                                                               | ER          | $DI_o/RC$               |
| SNP-1.2950882                                                         | GO: 0000166            | LOC_Os01g06240                   | Protein kinase                                                      | ER          | $DI_o/RC$               |
| SNP-1.3777578                                                         | GO: 0000166            | LOC_Os01g07870                   | Transporter family protein type A                                   | ER          | $DI_o/RC$               |
| SNP-1.20577084                                                        | GO: 0000166            | LOC_Os01g36920                   | ATP-dependent DEAD-box RNA helicase                                 | ER          | N<br>$1-Q_bRC$          |
| SNP-1.32181171                                                        | GO: 0000166            | LOC_Os01g55880                   | DNA hemimethylated domain-binding protein                           | ER          | $S_m$<br>N              |
| SNP-2.18755532                                                        | GO: 0000166            | LOC_Os02g31290                   | AML1                                                                | ER          | $RE_o/RC$ $S_m$<br>N    |
| SNP-3.6370379                                                         | GO: 0000166            | LOC_Os03g12150                   | Serine/threonine receptor protein kinase precursor                  | ER          | N                       |

| SNP                                                   | GO Term     | ID                               | Functional annotation                                                                | Environment | Phenotype           |
|-------------------------------------------------------|-------------|----------------------------------|--------------------------------------------------------------------------------------|-------------|---------------------|
| SNP-3.33035702                                        | GO: 0000166 | LOC_Os03g59600                   | Mitochondrial RhoGTPase1                                                             | ER          | DI <sub>o</sub> /RC |
| SNP-3.33935702                                        | GO: 0000166 | LOC_Os03g59620                   | Phospholipase of the patatin family                                                  | ER          | DI <sub>o</sub> /RC |
| SNP-5.13606968                                        | GO: 0000166 | LOC_Os05g23800                   | Motif for RNA recognition                                                            | ER          | S <sub>m</sub><br>N |
| SNP-5.25752878<br>SNP-5.25755857                      | GO: 0000166 | LOC_Os05g44340                   | Heat shock protein 101                                                               | ER          | DI <sub>o</sub> /RC |
| SNP-5.25860213<br>SNP-5.25870238                      | GO: 0000166 | LOC_Os05g44560                   | Protein Kinesin motor domain                                                         | ER          | DI <sub>o</sub> /RC |
| SNP-5.26037406<br>SNP-5.26067844                      | GO: 0000166 | LOC_Os05g44922                   | 6-phosphofructokinase                                                                | ER          | DI <sub>o</sub> /RC |
| SNP-5.26037406<br>SNP-5.26067844                      | GO: 0000166 | LOC_Os05g44930                   | Protein kinase type receptor                                                         | ER          | DI <sub>o</sub> /RC |
| SNP-5.26067844                                        | GO: 0000166 | LOC_Os05g44940                   | Protein containing kinase domain                                                     | ER          | DI <sub>o</sub> /RC |
| SNP-5.26067844                                        | GO: 0000166 | LOC_Os05g44970                   | Senescence receptor precursor of the Serine / Threonine protein kinase type          | ER          | DI <sub>o</sub> /RC |
| SNP-6.17586886                                        | GO: 0000166 | LOC_Os06g30430                   | RPM1 disease resistance protein                                                      | ER          | N                   |
| SNP-8.17383104                                        | GO: 0000166 | LOC_Os08g28470                   | RPM disease resistance protein                                                       | ER          | N                   |
| SNP-11.9898109                                        | GO: 0000166 | LOC_Os09g02400                   | RNP RNA binding region                                                               | ER          | DI <sub>o</sub> /RC |
| SNP-9.8690732                                         | GO: 0000166 | LOC_Os09g14660                   | Legume lectins containing beta domain proteins                                       | ER          | PI <sub>total</sub> |
| SNP-12.1522824                                        | GO: 0000166 | LOC_Os12g03750                   | Leucine-rich protein family in                                                       | ER          | DI <sub>o</sub> /RC |
| SNP-12.18066755                                       | GO: 0000166 | LOC_Os12g30150                   | CAMK_CAMK_del type 47 - CAMK includes calcium / calmodulin-dependent protein kinases | ER          | Q <sub>b</sub> RC   |
| SNP-12.18757106<br>SNP-12.19687181<br>SNP-12.19687181 | GO: 0000166 | LOC_Os12g31200<br>LOC_Os12g32680 | Domain that contains NB-ARC                                                          | ER          | Q <sub>b</sub> RC   |
| SNP-12.19687181                                       | GO: 0000166 | LOC_Os12g32670                   | CC-NBS-LRR resistance protein                                                        | ER          | N                   |

## Figure Legends:

**Figure 1:** Genetic structure of the population: PCA analysis for the first two PCs, the CH environment is represented in light gray and the ER environment is represented in dark gray.

**Figure 2:** Box plots of fluorescence phenotypes with significant associations in GWAS analysis. The line inside the box represents the mean value of each phenotype, the top and bottom of each represent the 1st and 3rd quartiles. Open circles represent outliers within the dataset. (A). Gray boxes phenotypes corresponding to the environment CH. (B). White boxes phenotypes corresponding to the ER environment.

**Figure 3:** Manhattan plots for the significant phenotypes found using GWAS for the environment CH. (A). Plots for the  $F_o/F_m$ ,  $F_v/F_m$ ,  $DI_o/RC$ , and  $DF_{abs}$  phenotypes. (B). Plots for the  $\delta(R_o)$  and  $Pl_{abs}$  phenotypes. The box in red identifies the multi-phenotypic QTL and each SNP is represented by a gray or black dot. The x-axis shows each of the 12 rice chromosomes, the y-axis represents the negative base ten logarithms ( $-\log_{10}$ ) of each p-value corresponding to a particular SNP. The blue line that cuts the y-axis represents the significance threshold value for each SNP.

**Figure 4:** Manhattan plots for the significant phenotypes found by GWAS for the ER environment. (A). Plots for the  $F_o/F_m$ ,  $F_v/F_m$ ,  $\delta(R_o)$ ,  $DI_o/RC$ ,  $DI_o/CS$ ,  $RE_o/RC$ ,  $N$  and  $S_m$  phenotypes, (B). Plots for the  $ET_o/RC$ ,  $Pl_{abs}$ ,  $Pl_{total}$ ,  $Q_bRC$ , and  $1 - Q_bRC$  phenotypes (hBN and HIBS). The box in red and the orange dotted line identify multi-phenotypic QTL, green box identifies the multi SNP QTLs, and each SNP is represented by a gray or black dot. The x-axis shows each of the 12 rice chromosomes, the y-axis represents the negative base ten logarithms ( $-\log_{10}$ ) of each p-value corresponding to a particular SNP. The blue line that cuts the y-axis represents the significance threshold value for each SNP.

**Figure 5:** Box diagram of the analyzed yield components. Gray boxes represent plants grown in the CH environment. White boxes represent plants grown in the ER environment. The line inside the box represents the mean value of each phenotype, the top and bottom of each represent the 1st and 3rd quartiles. Open circles represent outliers within the dataset.

**Figure 1: Genetic structure of the population: PCA analysis for the first two PCs, the CH environment is represented in light gray and the ER environment is represented in dark gray.**

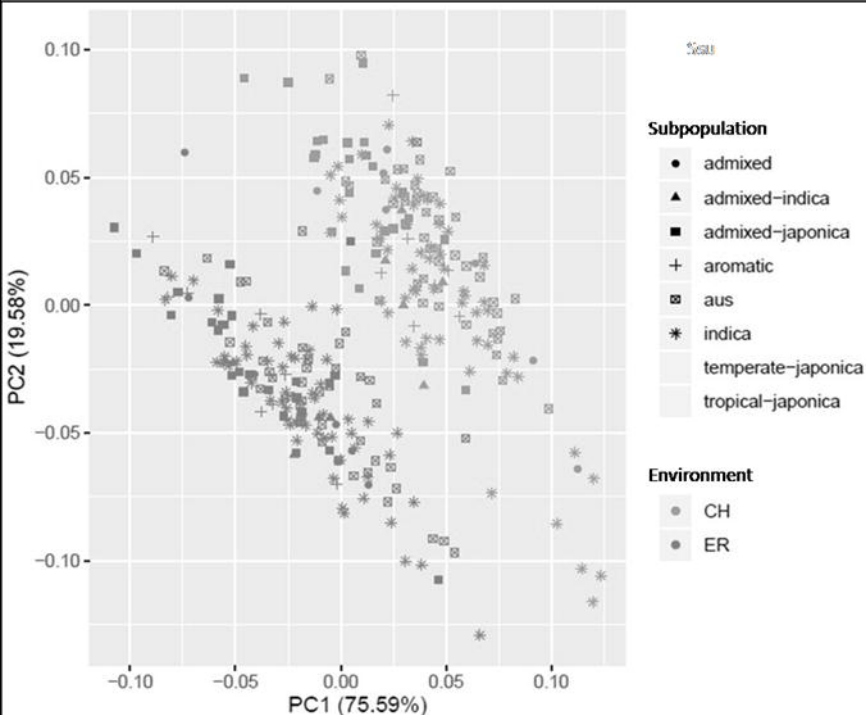



**Figure 2: Box plots of fluorescence phenotypes with significant associations in GWAS analysis. The line inside the box represents the mean value of each phenotype, the top and bottom of each represent the 1st and 3rd quartiles. Open circles represent outliers within the dataset. (A). Gray boxes phenotypes corresponding to the environment CH. (B). White boxes phenotypes corresponding to the ER environment.**

**A**

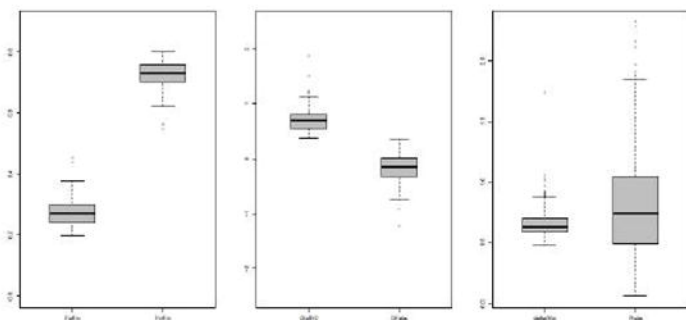

**B**

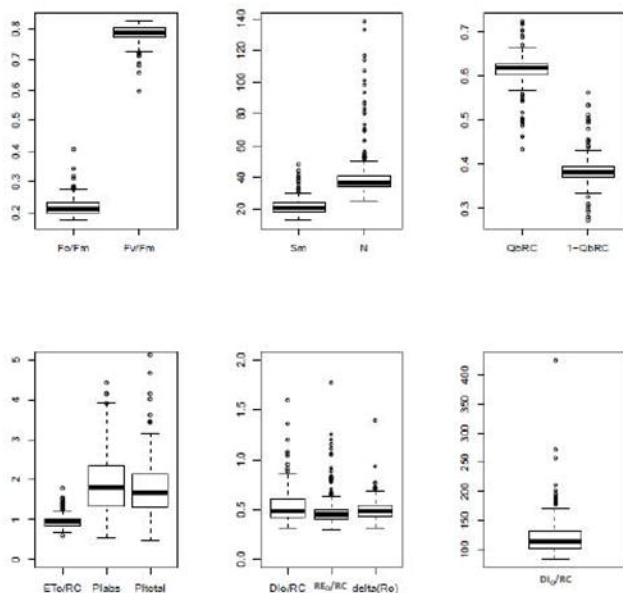

**Figure 3: Manhattan plots for the significant phenotypes found using GWAS for the environment CH. (A). Plots for the Fo/Fm, Fv/Fm Dfo/RC, and DFabs phenotypes. (B). Plots for the  $\delta(Ro)$  and Plabs phenotypes. The box in red identifies the multi-phenotypic QTL and each SNP is represented by a gray or black dot. The x-axis shows each of the 12 rice chromosomes, the y-axis represents the negative base ten logarithms ( $-\log_{10}$ ) of each p-value corresponding to a particular SNP. The blue line that cuts the y-axis represents the significance threshold value for each SNP.**

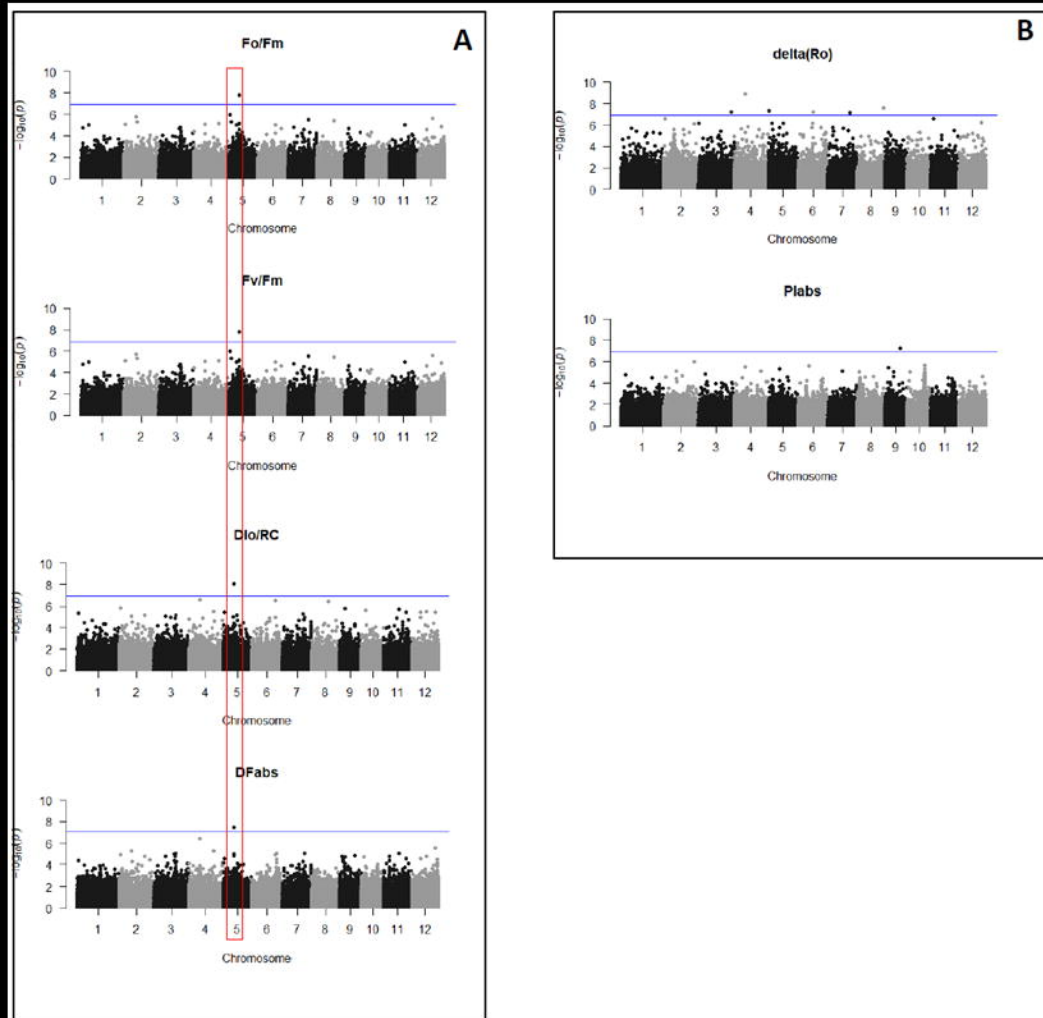

**Figure 4: Manhattan plots for the significant phenotypes found by GWAS for the ER environment. (A). Plots for the Fo /Fm, Fv/Fm,  $\delta(Ro)$ , DIo/RC, DIo/CS, REo/RC, N and Sm phenotypes, (B). Plots for the ETo/RC, PIabs, PItotal, QbRC, and 1- QbRC phenotypes (hBN and HIBS). The box in red and the orange dotted line identify multi-phenotyp QTL, green box identifies the multi SNP QTLs, and each SNP is represented by a gray or black dot. The x-axis shows each of the 12 rice chromosomes, the y-axis represents the negative base ten logarithms ( $-\log_{10}$ ) of each p-value corresponding to a particular SNP. The blue line that cuts the y-axis represents the significance threshold value for each SNP.**

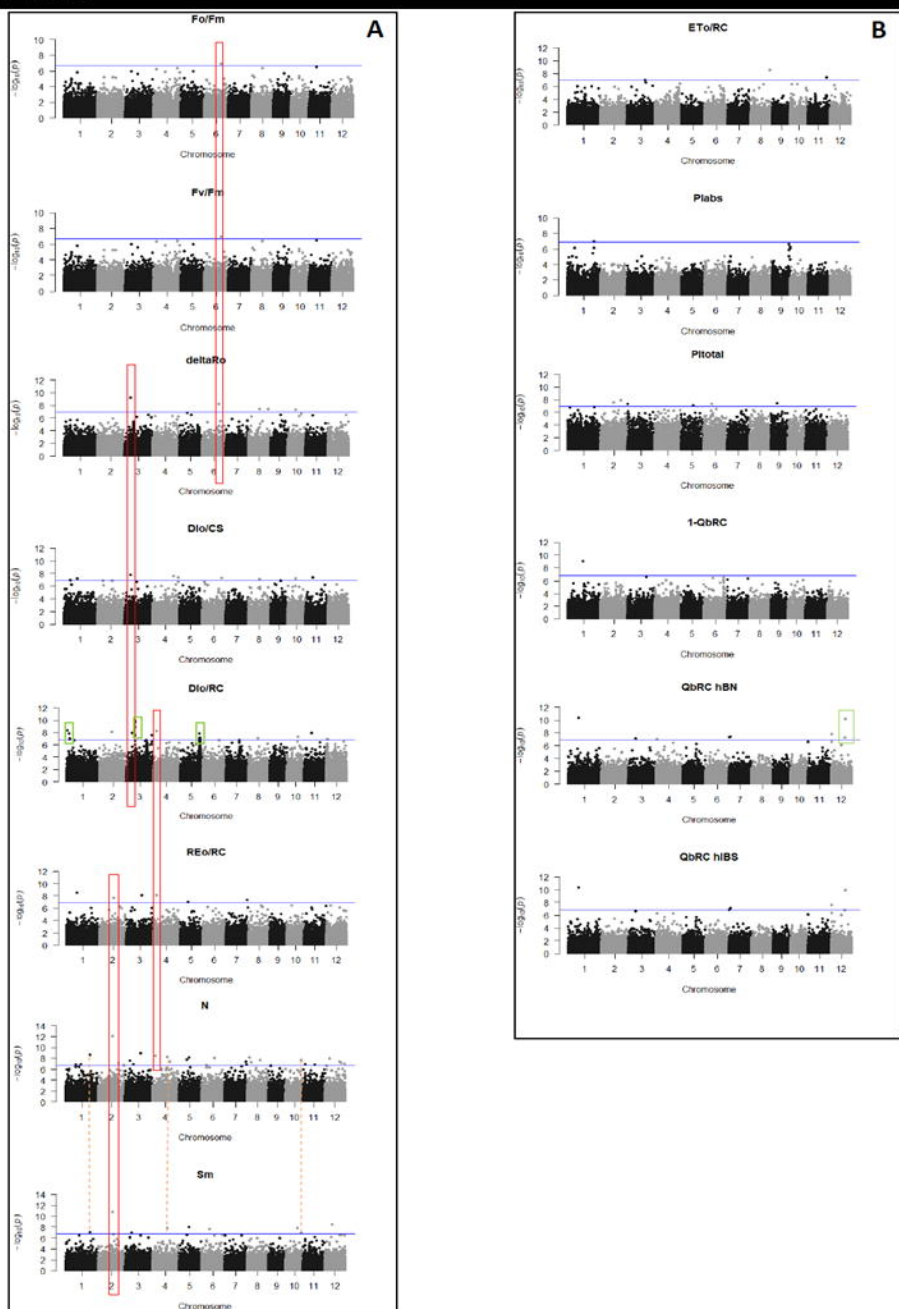

**Figure 5: Box diagram of the analyzed yield components. Gray boxes represent plants grown in the CH environment. White boxes represent plants grown in the ER environment. The line inside the box represents the mean value of each phenotype, the top and bottom of each represent the 1st and 3rd quartiles. Open circles represent outliers within the dataset.**

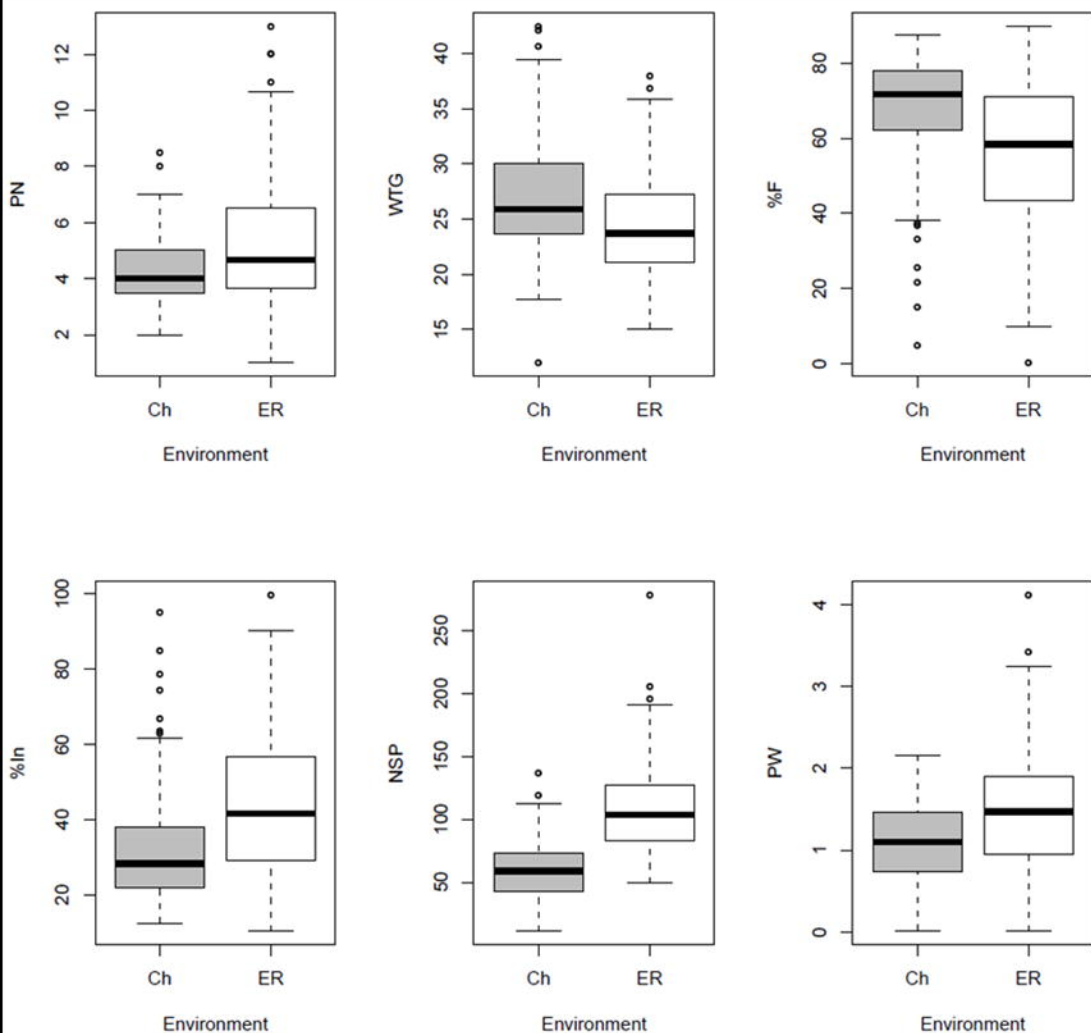

Source: http://biorxiv.org/content/10.1101/2020.09.28.317479v1.full.pdf
